# 1 **Transmission Expression Signature in Nascent *Plasmodium vivax*** 2 **Blood Stage Infection**

3 Swamy Rakesh Adapa<sup>1¶</sup>, Rachel A. Taylor<sup>2¶</sup>, Chengqi Wang<sup>1</sup>, Richard Thomson-Luque<sup>1</sup>, Leah R.  
4 Johnson<sup>2</sup> and Rays H.Y. Jiang<sup>1\*</sup>

5 <sup>1</sup> Department of Global Health (GH) & Center for Drug Discovery and Innovation (CDDI), College of  
6 Public Health, University of South Florida. Tampa, FL 33612, USA

7 <sup>2</sup> Department of Integrative Biology, University of South Florida. Tampa, FL, USA

8 \*Corresponding Author Email: [jiang2@health.usf.edu](mailto:jiang2@health.usf.edu)

9 ¶These authors contributed equally to this work.

## 10 **Abstract**

11 The lack of a continuous *in vitro* culture system for *Plasmodium vivax* severely limits our knowledge of  
12 pathophysiology of the most widespread malaria parasite. To gain direct understanding of *P. vivax*  
13 human infections, we used Next Generation Sequencing data mining to unravel parasite *in vivo*  
14 expression profiles for *P. vivax*, and *P. falciparum* as comparison. We performed cloud and local  
15 computing to extract parasite transcriptomes from publicly available raw data of human blood samples.  
16 We developed a Poisson Modelling (PM) method to confidently identify parasite derived transcripts in  
17 mixed RNAseq signals of infected host tissues. We successfully retrieved and reconstructed parasite  
18 transcriptomes from infected patient blood as early as the first blood stage cycle; and the same  
19 methodology did not recover any significant signal from controls. Surprisingly, these first generation  
20 blood parasites already show strong signature of transmission, which indicates the commitment from  
21 asexual-to-sexual stages. Further, we develop mathematical models for *P. vivax* and *P. falciparum* to  
22 assess the epidemiological impact of possible 7-day early stage transmission and *P. vivax* complex  
23 life cycle. The study uncovers the earliest onset of *P. vivax* blood pathogenesis and highlights the  
24 challenges of *P. vivax* eradication programs.

## 25 **Author summary**

26 We discovered that *P. vivax in vivo* parasitemia is associated with gametocytogenesis expression  
27 signature within the first blood stage cycle, that is, eight days from a mosquito bite. Our results  
28 suggest that asexual-to-sexual commitment may happen with first generation merozoite infection.  
29 This allows for the possibility of transmission at this early stage, much earlier than for *P. falciparum*.  
30 Our novel mathematical model accounts for multiple unique aspects of *P. vivax* biology to advance  
31 our understanding of expected disease prevalence, and compares the results to those of *P.*  
32 *falciparum*. We demonstrate that given the presence of asymptomatic carriers and the possibility of  
33 relapses, earlier parasite transmission is capable of increasing the spread of disease within human  
34 populations. In summary, *P. vivax* gametogenesis has the potential to fast track the transmission  
35 cycle, which will drive enhanced propagation of the disease during the transmission season and  
36 clinical relapses.

## 37 Introduction

38 *Plasmodium vivax* (*P. vivax*) infection has the most widespread distribution across different  
39 continents of any malaria parasite, with up to 2.6 billion people estimated to be at risk [1]. It can lead  
40 to severe disease and death but, despite the high disease burden [2], there is a lack of in-depth  
41 understanding of the distinct pathogenesis of *P. vivax*. This has resulted in a lack of targeted control  
42 measures. Thus, as malaria cases decline overall, the proportion of cases attributable to *P. vivax* is  
43 on the rise [3].

44 *P. vivax* has a complex transmission cycle with distinct biological features compared to other  
45 malaria parasites, most notably: the high prevalence of asymptomatic carriers and the potential for  
46 disease relapses; and gametocytes in circulation at the very beginning of infections. In contrast to the  
47 better studied *Plasmodium falciparum*, *P. vivax* has the unique ability to remain as dormant  
48 hypnozoites in a hepatocyte in the liver and, in the future, to reactivate a blood stage infection leading  
49 to what is termed a clinical relapse [4, 5]. Unlike *P. falciparum*, there are currently no established  
50 laboratory methods to culture *P. vivax in vitro* [6]. Furthermore, in *P. vivax*, the merozoites from both  
51 exo-erythrocytic and intra-erythrocytic schizogony only successfully infect reticulocytes [6], which  
52 typically comprise about one percent of red blood cell. This leads to low parasitemia rates in  
53 peripheral circulation. The host requirement of human reticulocytes and many other technical  
54 challenges hampers studies of this parasite. These unique *P. vivax* life cycle characteristics pose  
55 major challenges for the understanding of *P. vivax* pathogenesis and hence the elimination of malaria  
56 worldwide [5].

57 Human malaria infection starts with the inoculation of sporozoites into the skin dermis through the  
58 proboscis of female *Anopheles* mosquitoes, where it is hosted in her salivary glands. Some part of the  
59 inoculum enters the bloodstream and within a few minutes they invade hepatocytes in the liver [7, 8].  
60 During the next five to eight days (depending on the *Plasmodium* spp), the parasite transforms into a  
61 large exoerythrocytic form, packed with thousands of merozoites inside a parasitophorous vacuolar  
62 membrane (PVM). As the parasite matures the membrane breaks down into small packets of vesicles  
63 filled with merozoites. These are released into the blood stream, leading to erythrocytic invasion [9]. In  
64 the next 48 hours the parasite undergoes mitotic division and cytoplasmic growth inside the  
65 erythrocyte. They may develop either directly into a schizont (asexual) or gametocyte (sexual) [5].  
66 For *P. falciparum* the sexual stages are not found in the periphery until after multiple blood stage  
67 cycles because gametogenesis, which requires bone marrow sequestration, takes 10 to 12 days, to  
68 achieve the fully transmissible stage V gametocyte [10]. In contrast, the appearance of *P. vivax*  
69 sexual stages is believed to be much earlier [5]. However, whether sexual commitment in *P. vivax*  
70 occurs early still needs to be determined.

71 In this study (Fig 1), we directly examine patient blood sequencing data to recover *P. vivax*  
72 transcripts in the earliest time point possible during the blood stage, i.e. immediately after sporozoite  
73 invasion and the liver stage parasite ruptures into the blood stream. We discovered a very early  
74 gametogenesis expression signature, indicating the possibility of very early sexual commitment and  
75 possible transmission. Lastly, to evaluate the epidemiological impact of this possible early

76 transmission, we constructed a mathematical model of *P. vivax* transmission, which quantifies the  
77 effect of relapses, asymptomatic carriers and early transmission.

78

## 79 **Material and methods**

### 80 **Mining parasite data from infected human tissues**

81 We used the blood transcriptome data sets deposited in Gene Expression Omnibus (GEO) under  
82 accession numbers GSE67184, GSE61252 associated with the *in vivo* *P. vivax* sporozoite challenge  
83 [11] and *ex vivo* *P. vivax* asexual stage culture [12] respectively. We also use the *in vivo* *P. falciparum*  
84 infection genomic reads [13] deposited in DNA Data Bank of Japan (DDBJ) under accession number  
85 DRA000949 to compare the transcript abundances with the above datasets.

86 PathoScope 2.0 [14] framework is used to quantify proportions of reads from individual species  
87 present in sequencing data from samples from environmental or clinical sources. A spot Elastic  
88 Computing Cloud (EC2) instance r3.4xlarge (Virtual CPUs – 16, Memory (GB) – 122, Storage (SSD  
89 GB) – 320)) was deployed at pricing of \$0.13/hour. All the computational storage was synced with  
90 Amazon Simple Storage Service (Amazon S3), which automatically scales according to the current  
91 usage requirements. This facility gave us a cost effective (\$0.03 per GB) advantage over the fixed  
92 storage on the local computing cluster. We used the Patholib module along with National Center for  
93 Biotechnology Information (NCBI) vast nucleotide database to create filter genomes containing host  
94 (human), microbes (virus, bacteria), artificially added sequence (PhiX Control v3, Illumina) and target  
95 genome library containing *P. vivax* *Sal-1* sequences using their respective taxonomic identifiers.  
96 PathoMap module is used to align the reads to target library using the Bowtie2 algorithm [15] and  
97 then filters reads that aligned to the filtered genomes. PathoReport was used to annotate the  
98 sequences.

99 The Tuxedo suite [16] of programs (Bowtie2, TopHat2, and Cufflinks) were used to process and  
100 analyze the data. Reference genomes of Human (*GHRc37*) from Ensembl human genome database  
101 and *P. vivax* *Sal-1* from PlasmoDB—a Plasmodium genome resource. Bowtie2 [15] was used to build  
102 indexes of the reference genomes. RNASeq reads from each sample were aligned to the *P. vivax*  
103 *Sal-1* genome using TopHat2 (v. 1.4.1) [17]. A maximum of one mismatch per read was allowed. The  
104 mapped reads from TopHat were used to assemble known transcripts from the reference, and their  
105 abundance FPKM values were calculated for all genes (FPKM: fragments per kilobase of exon per  
106 million fragments mapped) using Cufflinks.

### 107 **Gene expression level estimation with Poisson Modelling (PM)**

108 Poisson distribution has been widely used to estimate the background level of gene expression  
109 [18-20]. In this work, we used Poisson distribution to model the background expression level ( $x$ ) for  
110 each patient.

$$111 \quad x \sim \text{Pois}(\lambda) \quad (1)$$

112 
$$p(x|\lambda) = \frac{e^{-\lambda}\lambda^x}{x!} \quad (2)$$

113 It is well known that the unbiased estimator of  $\lambda$  is the mean value of  $x$ , which can be calculated  
114 from maximum likelihood estimation.

115 
$$\hat{\lambda} = \frac{\sum x}{n} \quad (3)$$

116 where  $\sum x$  is the sum of gene expression level of specific patient or gene;  $n$  is the number of genes  
117 considered. Finally, we can compare the expression levels between different patients or genes by  
118 using the mean value of estimated distribution.

### 119 **Mathematical modelling of *P. vivax* transmission**

120 The sexual stage specific genes are defined by using the 7 stages RNAseq data [21]. The stage  
121 specific RNAseq dataset is from Illumina-based sequencing of *P. falciparum* 3D7 mRNA from  
122 gametocyte stage II and gametocyte stage V), and ookinete. The dataset has also four time points of  
123 asexual stages representing ring, early trophozoite, late trophozoite, and schizont. The orthologs of *P.*  
124 *vivax* and *P. falciparum* were mapped with OrthoMCL data [22]. Sexual stage specific genes are  
125 required to have 20 or more fold expression level FPKM differences in the sexual stage (gametocytes,  
126 ookinete) vs the time points in the blood stages. The expression differences between asexual and  
127 sexual stages were analyzed with Fisher's Exact tests, and the P values (<0.001) were adjusted by  
128 multiple hypothesis correction with Benjamini-Hochberg method.

129 We created two mathematical models to represent the population-level spread of transmission  
130 among humans and mosquitoes for *P. falciparum* and *P. vivax* malaria. We do this to allow  
131 comparisons between the two malaria diseases, in order to assess which differences between the two  
132 have the most influence in producing the current epidemiological profile of the two diseases. This can  
133 inform us whether our genomics research results are an important aspect of *P. vivax* spread within  
134 populations. We categorize humans and mosquitoes into compartments based on their infection  
135 status, such as Susceptible, Exposed, Asymptomatic and Infected (see Supplementary Text S1), with  
136 additional compartments in the *P. vivax* model to account for the potential for relapses. For each  
137 model we calculate  $R_0$ , the basic reproductive number of the disease. This is a commonly used,  
138 fundamental metric of disease transmission potential defined as the number of people one infected  
139 person is able to infect in a susceptible population. If  $R_0 > 1$  then the disease is likely to take off and  
140 spread widely throughout the population. As the models for *P. vivax* and *P. falciparum* contain many  
141 similar components, we assess the relative  $R_0$  for the diseases, i.e. we divide all values of  $R_0$  for *P.*  
142 *vivax* by the value of  $R_0$  for *P. falciparum*. The model structure and resultant calculation of relative  $R_0$   
143 allows us to easily make comparisons between the two diseases as well as ignore potential error in  
144 parameter values for those parameters which are shared between the two models.

145 In order to assess the impact of early transmission in humans on disease spread compared to  
146 other differences between *P. falciparum* and *P. vivax*, we perform a sensitivity analysis of  $R_0$  for *P.*  
147 *vivax*. For each parameter, we vary its value and calculate the new value of  $R_0$  to determine the effect

148 of each parameter. We introduce parameter  $\epsilon$  to represent the reduction in the length of the  
149 incubation period for *P. vivax* in comparison to *P. falciparum*; thus  $\epsilon$  varies from 0 to 7 days to indicate  
150 a reduction from 14 to 7 days in the incubation period. That is, the larger  $\epsilon$  is, the bigger a difference  
151 between *P. falciparum* and *P. vivax*, indicating earlier transmission for the latter disease. The  
152 parameter  $p$  represents the proportion of humans that are symptomatic in the *P. falciparum* model,  
153 and thus  $p$  varies from 0 to 1. In comparison,  $k_3p$  indicates the proportion of symptomatic hosts in the  
154 *P. vivax* model, therefore, by focusing on  $k_3$  between 0 and 1, there are more asymptomatic cases for  
155 *P. vivax* than for *P. falciparum*. All other parameters are varied by 10% to create a range from 90% to  
156 110% of the baseline value of each parameter. The more  $R_0$  changes when a parameter is varied, the  
157 more influence that parameter has on  $R_0$ . In this way we can compare how much effect reducing the  
158 length of the intrinsic incubation period has on disease spread versus the role of asymptomatic  
159 spread or relapses.

160 Full details of the models created and the parameter values chosen as base values are presented  
161 in S1 Text.

## 162 **Results**

### 163 **Using cloud-based computational pipelines to mine parasite derived transcript**

164 To understand *P. vivax* *in vivo* pathogenesis, we first utilized a set of publicly available NGS raw  
165 data from Rojas-Pina et al. [11] that examined human immune responses against malaria. We  
166 performed computational analysis to extract the low levels of parasite signals from the raw  
167 sequencing data. The study by Rojas-Pina et al. performed sporozoite challenge on 12 volunteers  
168 with a single source of *P. vivax*, and generated whole blood RNAseq before and after the challenge.  
169 The post-infection RNAseq was produced on day 8-9 (diagnosis day), i.e., the first blood stage cycle  
170 after the liver stage infection which usually lasts for about 6-7 days [7, 8]. Due to the very low levels of  
171 parasitemia at this time point, we first used a cloud-based data mining pipeline to obtain pathogen  
172 sequences (*P. vivax*) in order to investigate the feasibility of our project. We deployed the program  
173 PathoScope 2.0 in the Amazon Elastic Compute Cloud (Amazon EC2: [aws.amazon.com/ec2](http://aws.amazon.com/ec2)), due to  
174 the computational scalability that can be achieved within a few minutes. We mapped the entire set of  
175 raw sequencing reads to the NCBI NR(Non-Redundant) reference sequences and set *P. vivax*  
176 reference (Sal I) as targets. We have also used other pathogens such as viruses and bacteria as non-  
177 targets to increase the search specificity. From a total of 12 pairs of pre and post infection RNAseq  
178 raw sequencing reads data sets, we successfully detected *P. vivax* sequences from 1,000 to almost  
179 50,000 reads in post-infection samples (Fig 2A). In contrast, none of the pre-infection samples gave a  
180 significant amount of reads ( $> 10$ ). From this analysis, we concluded that we could precisely recover  
181 up to 50,000 *P. vivax* transcripts derived sequencing reads at this very early stage asexual replication.

### 182 **Reconstruction of *P. vivax* *in vivo* transcriptome from very early blood stage** 183 **infection.**

184 Next, we used the Tuxedo RNAseq pipeline [16] to reconstruct transcriptomes from the 12 post-  
185 infection samples, which is deployed in USF research computing cluster. We aligned the entire  
186 sequence data to *P. vivax* *Sal 1* and Human (*GHRc37*) reference genome and estimated the  
187 transcript abundances. The majority of the raw reads cannot be assigned to any references, primarily  
188 due to reads quality and possibly a small amount belonging to unknown genomes and the Phix179  
189 control genome generally used during sequencing library construction. Reads originating from Phix  
190 were filtered prior to implementation of the Tuxedo RNAseq pipeline. An average of 16.8% of the  
191 reads can be mapped to human genome reference *GRCh37*. On average only 0.45% total reads on  
192 average mapped to the *P. vivax* reference genome (Fig 2B). From the 12 post-infection RNAseq  
193 pathogen transcriptomes, we can detect over 95% of the 5625 total protein coding genes expressed  
194 at > 20 FPKM (fragments per kilobase of exon per million fragments mapped). For each patient, we  
195 can identify from 9% to over 50% of the total protein-coding *P. vivax* genes are expressed at > 20  
196 FPKM (S1A Fig).

197 To confidently identify parasite derived RNAseq signal from infected host tissues, we developed a  
198 Poisson Modelling (PM) method to characterize positive pathogen signals above the background. We  
199 modelled background signal with a Poisson distribution and estimated the significance of detected  
200 parasite transcriptional levels with a Maximum Likelihood method (S1 and S2 Table). To cross-  
201 validate our PM method, we have independently built our statistical model based on Negative  
202 Binomial Model (NBM) and obtained very similar results with only 0-2 genes expression in the control.  
203 Subsequently, we performed PM at two levels (S2A Fig). First, we used PM to evaluate patient level  
204 infection signals of before and after infection, taking the entire transcriptomes into account. Second,  
205 we used a gene-by-gene PM evaluation approach to identify the significantly expressed parasite  
206 genes in mixed sequencing results from human tissues (S2B Fig).

207 To understand the molecular patterns associated with *P. vivax* parasitemia, we designed a  
208 computational method to search for parasitemia associated genes. First, we grouped the patients into  
209 low ( $\leq 25$  ul), medium (34-55/ul) and high parasitemia (95-300/ul) groups, based on the reported  
210 levels of parasitemia on pre-patent day, i.e. a range of 11 - 13 days [23], a few days later than the  
211 RNAseq samples were collected. We recognize that, in reality, all the patients have very few parasites  
212 during this early stage of infection, and the categories are primarily for statistical analysis. Then we  
213 performed a Non parametric statistical analysis (Wilcoxon test with p values adjusted with multiple  
214 hypothesis testing correction) to search for transcripts that are positively and significantly associated  
215 with the levels of parasitemia. In the top 20 *in vivo* parasitemia associated genes ( $p < 0.05$ ), we  
216 identified genes with peak expressions in different asexual stages such as ring, trophozoite and  
217 schizont. We clearly identify a gametocyte expression signature at this early stage of *in vivo* infection  
218 in the top ranking markers.

## 219 ***P. vivax* parasitemia is associated with gametocytogenesis**

220 To understand the extent of gametocytogenesis gene expression and its relationship with parasite  
221 abundance, we search for how many known gametocyte specific markers are expressed. We first  
222 defined a set of 280 gametocyte specific genes by using *P. falciparum* orthologous gene expression



223 specificity (details in Materials and Methods). We discovered that between 8% to 60% all sexual stage  
224 specific genes are expressed in this early blood stage (S1B Fig). To further investigate the  
225 gametocytogenesis transcription pattern, we identified 48 gametocyte related genes from the patient  
226 infected transcriptomes. We were able to identify stage specific gametocyte markers with early  
227 markers [21] such as tubulin-specific chaperone PVX\_081315 and Pvs16 PVX\_000930. We also  
228 found late markers such as PVX\_116610, indicating that there might be mixed stages of gametocyte  
229 obligation at this early blood stage. Furthermore, we have found gender specific markers, such as  
230 female markers like PVX\_093600; as well as male markers such as PVX\_116610 (S3 Table),  
231 indicating that there are mixed genders of gametocytes developed from a single source of sporozoite  
232 challenge. The transcriptional factor PvAP2-G is considered a master regulator and a specific marker  
233 for early gametocyte production in malaria parasites [24]. We are able to clearly identify transcripts of  
234 PvAP2-G in 5 patients in the early blood stage (Fig 3A).

235 To validate our findings of gametocytogenesis expression signature *in vivo*, we analyzed an  
236 independently generated, publicly available data set of *ex vivo* RNAseq data from pooled infected  
237 patient blood [12]. To search for relationships between expression levels and gametocyte production,  
238 we classified the *ex vivo* *P. vivax* expression based on two transcriptome features in orthologous  
239 genes of *P. falciparum*, namely, 1) Level of expression and 2) Specificity of gametocyte stage  
240 expression. We first computed the average FPKM for each gene and converted the values into a rank  
241 score from 0 to 100, with 100 representing the highest relative expression levels. Then we analyzed  
242 the levels of gametocyte expression specificity by calculating the ratio of sexual stage FPKM vs.  
243 asexual stage FPKM, the higher values indicate higher levels of sexual stage expression specificity.  
244 We found that the gametocyte specific genes in fact are the highest expressed genes in the *ex vivo*  
245 data (Fig 3B). The top quartile of most highly expressed genes in the *ex vivo* data consists of more  
246 than 40% of gametocyte specific genes. The *ex vivo* data has even stronger gametocyte expression  
247 pattern than that of the early *in vivo* data (S3A, B Fig). The *ex vivo* enhanced gametocyte induction  
248 could be due to the abiotic stress of the culture conditions (S3A, B Fig). By analyzing the precise peak  
249 expression time in the *ex vivo* expression data set, we found that gametocyte specific genes are  
250 mostly expressed in late schizont/early ring stage, despite the fact that these stages have the lowest  
251 number peak expression genes (S4A, B Fig). *P. falciparum* and *P. vivax* appear to share a pattern in  
252 which commitment to gametocyte development occurs in the schizont stage[25]. The *ex vivo* analysis  
253 strongly supports our *in vivo* analysis, that *P. vivax* parasitemia is associated with commitment to  
254 gametocytemia.

255 We next compared our *in vivo* *P. vivax* analysis with that of *P. falciparum*. Similar to *P. vivax*  
256 analysis, we have identified the top 20 transcripts associated with parasitemia from 120 whole blood  
257 samples of *P. falciparum* infected patients (data deposited in the publication by Yamagishi, et al.) (Fig  
258 4A, B). We defined these markers by searching for the gene expression levels that are most strongly  
259 associated in Spearman correlations with the levels of *P. falciparum* parasitemia among over 5000  
260 unique transcripts. We found that in contrast to *P. vivax* parasitemia markers, *P. falciparum*  
261 parasitemia driven genes have peak expression only in the merozoite/early ring stages and many of  
262 them are associated with protein export as PEXEL containing proteins. None of the top *P. falciparum*

263 markers are gametocyte related in terms of peak expression pattern. Therefore, we conclude that the  
264 two malaria parasites *in vivo* pathogenesis show distinct patterns. *P. falciparum* parasitemia is likely  
265 to be associated with asexual cycle protein export and host red blood cell remodelling; whereas *P.*  
266 *vivax* shows clear gametocyte expression signatures from the first blood stage cycle.

## 267 **Mathematical modelling shows unique *P. vivax* transmission pattern**

268 We performed a sensitivity analysis of the effect of different components of *P. vivax* disease  
269 spread (Fig 5). The most influential parameter on  $R_0$ , the basic reproductive number of the disease, is  
270  $k_2$ , which determines the proportion of human hosts that recover with hypnozoites, and hence the  
271 possibility of relapse. It causes  $R_0$  to vary from less than 2.1 to over 2.5 times the values for *P.*  
272 *falciparum* (set to 1, when  $p = 1$ , where  $p$  is the proportion of *P. falciparum* hosts that are  
273 symptomatic). The second most influential parameter on changes in  $R_0$  is  $\varepsilon$ , the reduction in the  
274 length of the incubation period. When there is no difference between *P. falciparum* and *P. vivax*, that  
275 is  $\varepsilon$  is 0 days,  $R_0$  is lowered to less than 2.2. However, when the incubation period is shortened for *P.*  
276 *vivax* by  $\varepsilon = 7$  days, as we expect from our experimental results,  $R_0$  is 2.4. Therefore, if the reduction  
277 in incubation time is not considered, mathematical models could miscalculate  $R_0$ , underestimating it  
278 by approximately 11%. However, this assumes that reducing the time to potential transmission does  
279 not have any other impact on the disease characteristics. There could be a trade-off between the  
280 speed of gametocyte production and the efficiency of those gametocytes in transmitting the disease,  
281 and if so this would mitigate against the reduction in incubation length [26]. Parameters  $\nu$  and  $\eta$ , the  
282 rate of relapse and the rate of hypnozoite death in the liver respectively, are also influential in  
283 determining the value of  $R_0$ , as are the parameters related to proportion of hosts that show symptoms,  
284  $p$  and  $k_3$ . Introducing asymptomatic hosts simultaneously to both *P. falciparum* and *P. vivax* (i.e.  
285 changing  $p$ ) reduces the relative value of  $R_0$  for *P. vivax* because it has a larger impact on *P.*  
286 *falciparum*. However,  $R_0$  is more sensitive to parameter  $k_3$  than  $p$ , indicating that it is necessary to  
287 understand the likelihood of asymptomatic cases in *P. vivax* compared to *P. falciparum* to accurately  
288 predict differences in disease spread. The influence of these parameters highlights the importance of  
289 understanding the role of the asymptomatic stage correctly.

290 We further explore the role of the reduction in the incubation period length in Fig S5, which shows  
291 the effect of not including relapses in the model and not accounting for asymptomatic hosts  
292 transmitting the infection in *P. vivax*. When we model the asymptomatic class as capable of  
293 transmitting infection but are unsure what proportion of hosts are in this category, our uncertainty in  
294  $R_0$  is small (Fig S5A). On the other hand, when asymptomatic hosts for *P. vivax* exist but the  
295 existence of these asymptomatic cases is unknown and hence not modelled as capable of spreading  
296 disease, there is a drastic underestimation of  $R_0$ , the potential for spread, of *P. vivax* (Fig S5B). In fact,  
297 if more than 40% more infectious hosts are asymptomatic compared to *P. falciparum*, the estimate of  
298  $R_0$  for *P. vivax* would be less than for *P. falciparum* when in reality it is approximately 2.5 times larger.  
299 Similarly, when the model does not account for relapses, the estimate for  $R_0$  is halved (Fig S5B).



## 300 Discussion

301 Our study has uncovered the earliest possible *in vivo* infection data of blood stage *P. vivax*, a  
302 parasite that cannot be cultured in the laboratory. Our study is thus an example for infectious disease  
303 researchers on how to use large raw sequencing data to investigate previously intractable  
304 pathogenesis-related features. We used a cloud-based mining method as part of our study. This  
305 approach does not require local High Performance Computing (HPC) facilities and can accommodate  
306 high volumes of data analysis within short time frames. Infectious disease scientists could use similar  
307 approaches in resource-limited research settings. As the publicly available genomic data grow in  
308 complexity and volume every day, more efficient and more precise analytical tools are needed for  
309 future studies.

310 With malaria eradication always in the spotlight of the scientific and public health community, there  
311 is an urgent need to understand the unique biological and physiopathological features of *P. vivax*. If,  
312 as our data suggest, *P. vivax* transmission to mosquitoes is plausible at the very first blood stage  
313 cycle immediately after liver stage development, this would represent a major hurdle towards  
314 targeting *P. vivax* reservoirs. Due to ethical and practical limitations to obtain experimentally infected  
315 *P. falciparum* data *in vivo*, our study used *P. falciparum* data without defined infection age.  
316 Nevertheless, the major differences we have discovered between *P. vivax* and *P. falciparum*, in terms  
317 of *in vivo* gene expression, suggest that *P. vivax* begins gametocyte production immediately upon  
318 entering the blood, whereas more research is needed for early gametocyte production in *P.*  
319 *falciparum*.

320 Early stage I gametocytes of *P. falciparum* can be initially in peripheral blood and are microscopically  
321 indistinguishable from early rings [27, 28]. Yet, we did not find strong transmission expression  
322 signatures. It stands to reason that the 1-2 weeks of bone marrow sequestration that *P. falciparum*  
323 needs in order to achieve a fully transmissible stage V truly represents an advantage for *P. vivax*  
324 transmission over *P. falciparum*. Further, it has been described [29] that even very few gametocytes  
325 in circulation, as inferred from our study in *P. vivax*, can effectively mount an infection in the mosquito  
326 host. For asymptomatic infections, although the evidence is mixed and it has been suggested that the  
327 proportion of symptomatic and asymptomatic clinical forms is roughly similar for both species, when  
328 studied in native Amazonian populations [30], others have reported that the relative proportion of  
329 submicroscopic *P. vivax* is significantly higher than that of *P. falciparum* [31, 32]. Taking into account  
330 that over 89% of *P. vivax* submicroscopic infections are said to be asymptomatic [33], the balance in  
331 terms of better asymptomatic transmissibility falls on the side of *P. vivax*. Altogether, these evidence  
332 suggests that the differences we have discovered between *P. vivax* and *P. falciparum*, in terms of *in*  
333 *vivo* gene expression, suggests that *P. vivax* has the ability to spread quickly to multiple hosts before  
334 the onset of symptomatic phenotypes.

335 Our mathematical model, which accounts for *P. vivax* relapses, re-enforces the idea that *P. vivax*  
336 will be more difficult to eliminate. Hence, our results confirm the idea, held widely, that *P. vivax* will be  
337 the last parasite standing before the goal of malaria eradication is to be achieved [3]. Our model  
338 serves as a framework for further simulation and a better understanding of *P. vivax* population

339 dynamics. It can also be adapted to account for the potential evolutionary consequences of reducing  
340 the length of the incubation period. A shorter incubation period could indicate lower production of  
341 efficient gametocytes, therefore the probability of successful transmission from an infected human to  
342 mosquito could be reduced. This could be achieved by introducing a trade-off function between these  
343 two parameters in the model. However, the form of this trade-off function is not clear and would need  
344 to be investigated experimentally. The potential reduction in incubation period, and hence early  
345 transmission, has a substantial impact on disease spread, dependent on this evolutionary trade-off.  
346 Without including shorter incubation periods, models may underestimate the work required to reduce  
347 transmission of *P. vivax* within a population. Our model also highlights the importance of relapses and  
348 asymptomatic carriers, with relapses the most influential factor in leading to increases in disease  
349 spread. And yet, relapses are poorly understood with no consensus on what causes relapses to occur  
350 or on their frequency. Further, the importance of asymptomatic carriers is interesting as *P. vivax* has  
351 long been associated with milder disease symptoms and many patients could be asymptomatic [34].  
352 Our model highlights the importance of including the asymptomatic stage within models, even if the  
353 exact proportion of hosts that will not show symptoms is unknown.

354 Overall, the unique transmission of *P. vivax* leads to a much higher likelihood of disease spread  
355 compared to *P. falciparum* in similar settings. Our work highlights the challenge of *P. vivax*  
356 eradication and provides evidence for the need for more thorough and earlier transmission  
357 intervention measures. Controlled transcriptomic studies comparing *P. falciparum* and *P. vivax*  
358 gametocyte gene expression in oocysts and sporozoites are needed in order to understand how soon  
359 sexual commitment is decided in the *P. vivax* complex life cycle. Since *P. vivax* commits to  
360 gametocytogenesis early in the blood stage rationally designing a treatment or vaccine targeting the  
361 early blood stage will reduce transmission rates.

362

## 363 **Acknowledgement**

364 We would like to thank Justin Gibbons, Alison Roth and John H Adams for constructive discussions.

## 365 **References**

- 366 1. World Health O. World Malaria Report 2015: World Health Organization; 2016.
- 367 2. Battle KE, Gething PW, Elyazar IR, Moyes CL, Sinka ME, Howes RE, et al. The global public  
368 health significance of Plasmodium vivax. 2012.
- 369 3. Vogel G. The forgotten malaria. Science. 2013;342(6159):684-7.
- 370 4. White NJ, Imwong M. Relapse. Advances in parasitology. 2012;80:113-50. Epub 2012/12/04.  
371 doi: 10.1016/b978-0-12-397900-1.00002-5. PubMed PMID: 23199487.
- 372 5. Mueller I, Galinski MR, Baird JK, Carlton JM, Kochar DK, Alonso PL, et al. Key gaps in the  
373 knowledge of Plasmodium vivax, a neglected human malaria parasite. The Lancet infectious diseases.  
374 2009;9(9):555-66.
- 375 6. Noulin F, Borlon C, Van Den Abbeele J, D'Alessandro U, Erhart A. 1912–2012: a century of  
376 research on Plasmodium vivax in vitro culture. Trends in parasitology. 2013;29(6):286-94.
- 377 7. Sauerwein RW, Roestenberg M, Moorthy VS. Experimental human challenge infections can  
378 accelerate clinical malaria vaccine development. Nature reviews Immunology. 2011;11(1):57-64.

- 379 8. Hermsen CC, Telgt DSC, Linders EHP, van de Locht LATF, Eling WMC, Mensink EJBM, et al.  
380 Detection of Plasmodium falciparum malaria parasites in vivo by real-time quantitative PCR.  
381 Molecular and Biochemical Parasitology. 2001;118(2):247-51. doi: [https://doi.org/10.1016/S0166-6851\(01\)00379-6](https://doi.org/10.1016/S0166-6851(01)00379-6).  
382
- 383 9. Mikolajczak SA, Vaughan AM, Kangwanrangsan N, Roobsoong W, Fishbaugher M,  
384 Yimamnuaychok N, et al. Plasmodium vivax liver stage development and hypnozoite persistence in  
385 human liver-chimeric mice. Cell host & microbe. 2015;17(4):526-35.
- 386 10. Lensen A, Bril A, Van De Vegte M, Van Gemert GJ, Eling W, Sauerwein R. Plasmodium  
387 falciparum: infectivity of cultured, synchronized gametocytes to mosquitoes. Experimental  
388 parasitology. 1999;91(1):101-3.
- 389 11. Rojas-Peña ML, Vallejo A, Herrera S, Gibson G, Arévalo-Herrera M. Transcription profiling of  
390 malaria-naive and semi-immune Colombian volunteers in a Plasmodium vivax sporozoite challenge.  
391 PLoS Negl Trop Dis. 2015;9(8):e0003978.
- 392 12. Zhu L, Mok S, Imwong M, Jaidee A, Russell B, Nosten F, et al. New insights into the  
393 Plasmodium vivax transcriptome using RNA-Seq. Scientific reports. 2016;6.
- 394 13. Yamagishi J, Natori A, Tolba MEM, Mongan AE, Sugimoto C, Katayama T, et al. Interactive  
395 transcriptome analysis of malaria patients and infecting Plasmodium falciparum. Genome research.  
396 2014;24(9):1433-44.
- 397 14. Hong C, Manimaran S, Shen Y, Perez-Rogers JF, Byrd AL, Castro-Nallar E, et al. PathoScope  
398 2.0: a complete computational framework for strain identification in environmental or clinical  
399 sequencing samples. Microbiome. 2014;2(1):33.
- 400 15. Langmead B, Salzberg SL. Fast gapped-read alignment with Bowtie 2. Nature methods.  
401 2012;9(4):357-9.
- 402 16. Trapnell C, Roberts A, Goff L, Pertea G, Kim D, Kelley DR, et al. Differential gene and  
403 transcript expression analysis of RNA-seq experiments with TopHat and Cufflinks. Nature protocols.  
404 2012;7(3):562-78.
- 405 17. Kim D, Pertea G, Trapnell C, Pimentel H, Kelley R, Salzberg SL. TopHat2: accurate alignment  
406 of transcriptomes in the presence of insertions, deletions and gene fusions. Genome biology.  
407 2013;14(4):R36.
- 408 18. Anjum A, Jaggi S, Varghese E, Lall S, Bhowmik A, Rai A. Identification of Differentially  
409 Expressed Genes in RNA-seq Data of Arabidopsis thaliana: A Compound Distribution Approach.  
410 Journal of Computational Biology. 2016;23(4):239-47.
- 411 19. Hebenstreit D, Fang M, Gu M, Charoensawan V, van Oudenaarden A, Teichmann SA. RNA  
412 sequencing reveals two major classes of gene expression levels in metazoan cells. Molecular systems  
413 biology. 2011;7(1):497.
- 414 20. Sonesson C, Delorenzi M. A comparison of methods for differential expression analysis of  
415 RNA-seq data. BMC bioinformatics. 2013;14(1):91.
- 416 21. López-Barragán MJ, Lemieux J, Quiñones M, Williamson KC, Molina-Cruz A, Cui K, et al.  
417 Directional gene expression and antisense transcripts in sexual and asexual stages of Plasmodium  
418 falciparum. BMC genomics. 2011;12(1):587.
- 419 22. Chen F, Mackey AJ, Stoeckert CJ, Roos DS. OrthoMCL-DB: querying a comprehensive multi-  
420 species collection of ortholog groups. Nucleic acids research. 2006;34(suppl 1):D363-D8.
- 421 23. Arévalo-Herrera M, Forero-Peña DA, Rubiano K, Gómez-Hincapie J, Martínez NL, Lopez-Perez  
422 M, et al. Plasmodium vivax sporozoite challenge in malaria-naive and semi-immune Colombian  
423 volunteers. PLoS One. 2014;9(6):e99754.
- 424 24. Kafsack BFC, Rovira-Graells N, Clark TG, Bancells C, Crowley VM, Campino SG, et al. A  
425 transcriptional switch underlies commitment to sexual development in malaria parasites. Nature.  
426 2014;507(7491):248-52.
- 427 25. Bruce MC, Alano P, Duthie S, Carter R. Commitment of the malaria parasite Plasmodium  
428 falciparum to sexual and asexual development. Parasitology. 1990;100(02):191-200.

- 429 26. Koella JC, Antia R. Optimal pattern of replication and transmission for parasites with two  
430 stages in their life cycle. *Theoretical Population Biology*. 1995;47(3):277-91.
- 431 27. Sinden RE. Gametocytogenesis of *Plasmodium falciparum* in vitro: an electron microscopic  
432 study. *Parasitology*. 1982;84(1):1-11.
- 433 28. Tibúrcio M, Silvestrini F, Bertuccini L, Sander AF, Turner L, Lavstsen T, et al. Early  
434 gametocytes of the malaria parasite *Plasmodium falciparum* specifically remodel the adhesive  
435 properties of infected erythrocyte surface. *Cellular microbiology*. 2013;15(4):647-59.
- 436 29. Bousema T, Drakeley C. Epidemiology and infectivity of *Plasmodium falciparum* and  
437 *Plasmodium vivax* gametocytes in relation to malaria control and elimination. *Clinical microbiology  
438 reviews*. 2011;24(2):377-410.
- 439 30. Alves FP, Durlacher RR, Menezes MJ, Krieger H, Silva LHP, Camargo EP. High prevalence of  
440 asymptomatic *Plasmodium vivax* and *Plasmodium falciparum* infections in native Amazonian  
441 populations. *The American Journal of Tropical Medicine and Hygiene*. 2002;66(6):641-8.
- 442 31. Cheng Q, Cunningham J, Gatton ML. Systematic review of sub-microscopic *P. vivax* infections:  
443 prevalence and determining factors. *PLoS Negl Trop Dis*. 2015;9(1):e3413.
- 444 32. Adams JH, Mueller I. *The Biology of Plasmodium vivax*. Cold Spring Harbor Perspectives in  
445 Medicine. 2017:a025585.
- 446 33. Howes RE, Battle KE, Mendis KN, Smith DL, Cibulskis RE, Baird JK, et al. Global epidemiology  
447 of *Plasmodium vivax*. *The American Journal of Tropical Medicine and Hygiene*. 2016;95(6 Suppl):15-  
448 34.
- 449 34. Suárez-Mutis MC, Cuervo P, Leoratti F, Moraes-Avila SL, Ferreira AW, Fernandes O, et al.  
450 Cross sectional study reveals a high percentage of asymptomatic *Plasmodium vivax* infection in the  
451 Amazon Rio Negro area, Brazil. *Revista do Instituto de Medicina Tropical de São Paulo*.  
452 2007;49(3):159-64.

453

**Table 1. Patient specific information from literature and RNAseq data analysis.**

| Patient Number | SRR [10]   | Parasite Density on Pre-patent Day (Parasites/ $\mu$ L) [22] | Patient Location [10] | Total Reads | % reads aligned to Parasite Genome | % reads aligned to Human Genome |
|----------------|------------|--------------------------------------------------------------|-----------------------|-------------|------------------------------------|---------------------------------|
| 1              | SRR1925783 | 6                                                            | Cali                  | 800452      | 0.32                               | 17.52                           |
| 2              | SRR1925785 | 10                                                           | Cali                  | 1410398     | 0.24                               | 16.92                           |
| 3              | SRR1925803 | 20                                                           | Buenaventura          | 949274      | 0.09                               | 16.1                            |
| 4              | SRR1925797 | 25                                                           | Buenaventura          | 415781      | 0.19                               | 19.52                           |
| 5              | SRR1925781 | 34                                                           | Cali                  | 725123      | 1.1                                | 18.16                           |
| 6              | SRR1925795 | 34                                                           | Buenaventura          | 446940      | 0.09                               | 15.79                           |
| 7              | SRR1925787 | 38                                                           | Cali                  | 1055063     | 0.1                                | 13.43                           |
| 8              | SRR1925799 | 55                                                           | Buenaventura          | 587972      | 0.29                               | 16.51                           |
| 9              | SRR1925788 | 95                                                           | Cali                  | 1570675     | 0.43                               | 16.81                           |
| 10             | SRR1925790 | 110                                                          | Cali                  | 712547      | 1.13                               | 18.48                           |
| 11             | SRR1925798 | 216                                                          | Buenaventura          | 1238628     | 0.98                               | 15.14                           |
| 12             | SRR1925791 | 390                                                          | Buenaventura          | 711395      | 0.2                                | 17.49                           |

bioRxiv preprint doi: <https://doi.org/10.1101/175018>; this version posted August 11, 2017. The copyright holder for this preprint (which was not certified by peer review) is the author/funder, who has granted bioRxiv a license to display the preprint in perpetuity. It is made available under aCC-BY-ND 4.0 International license.



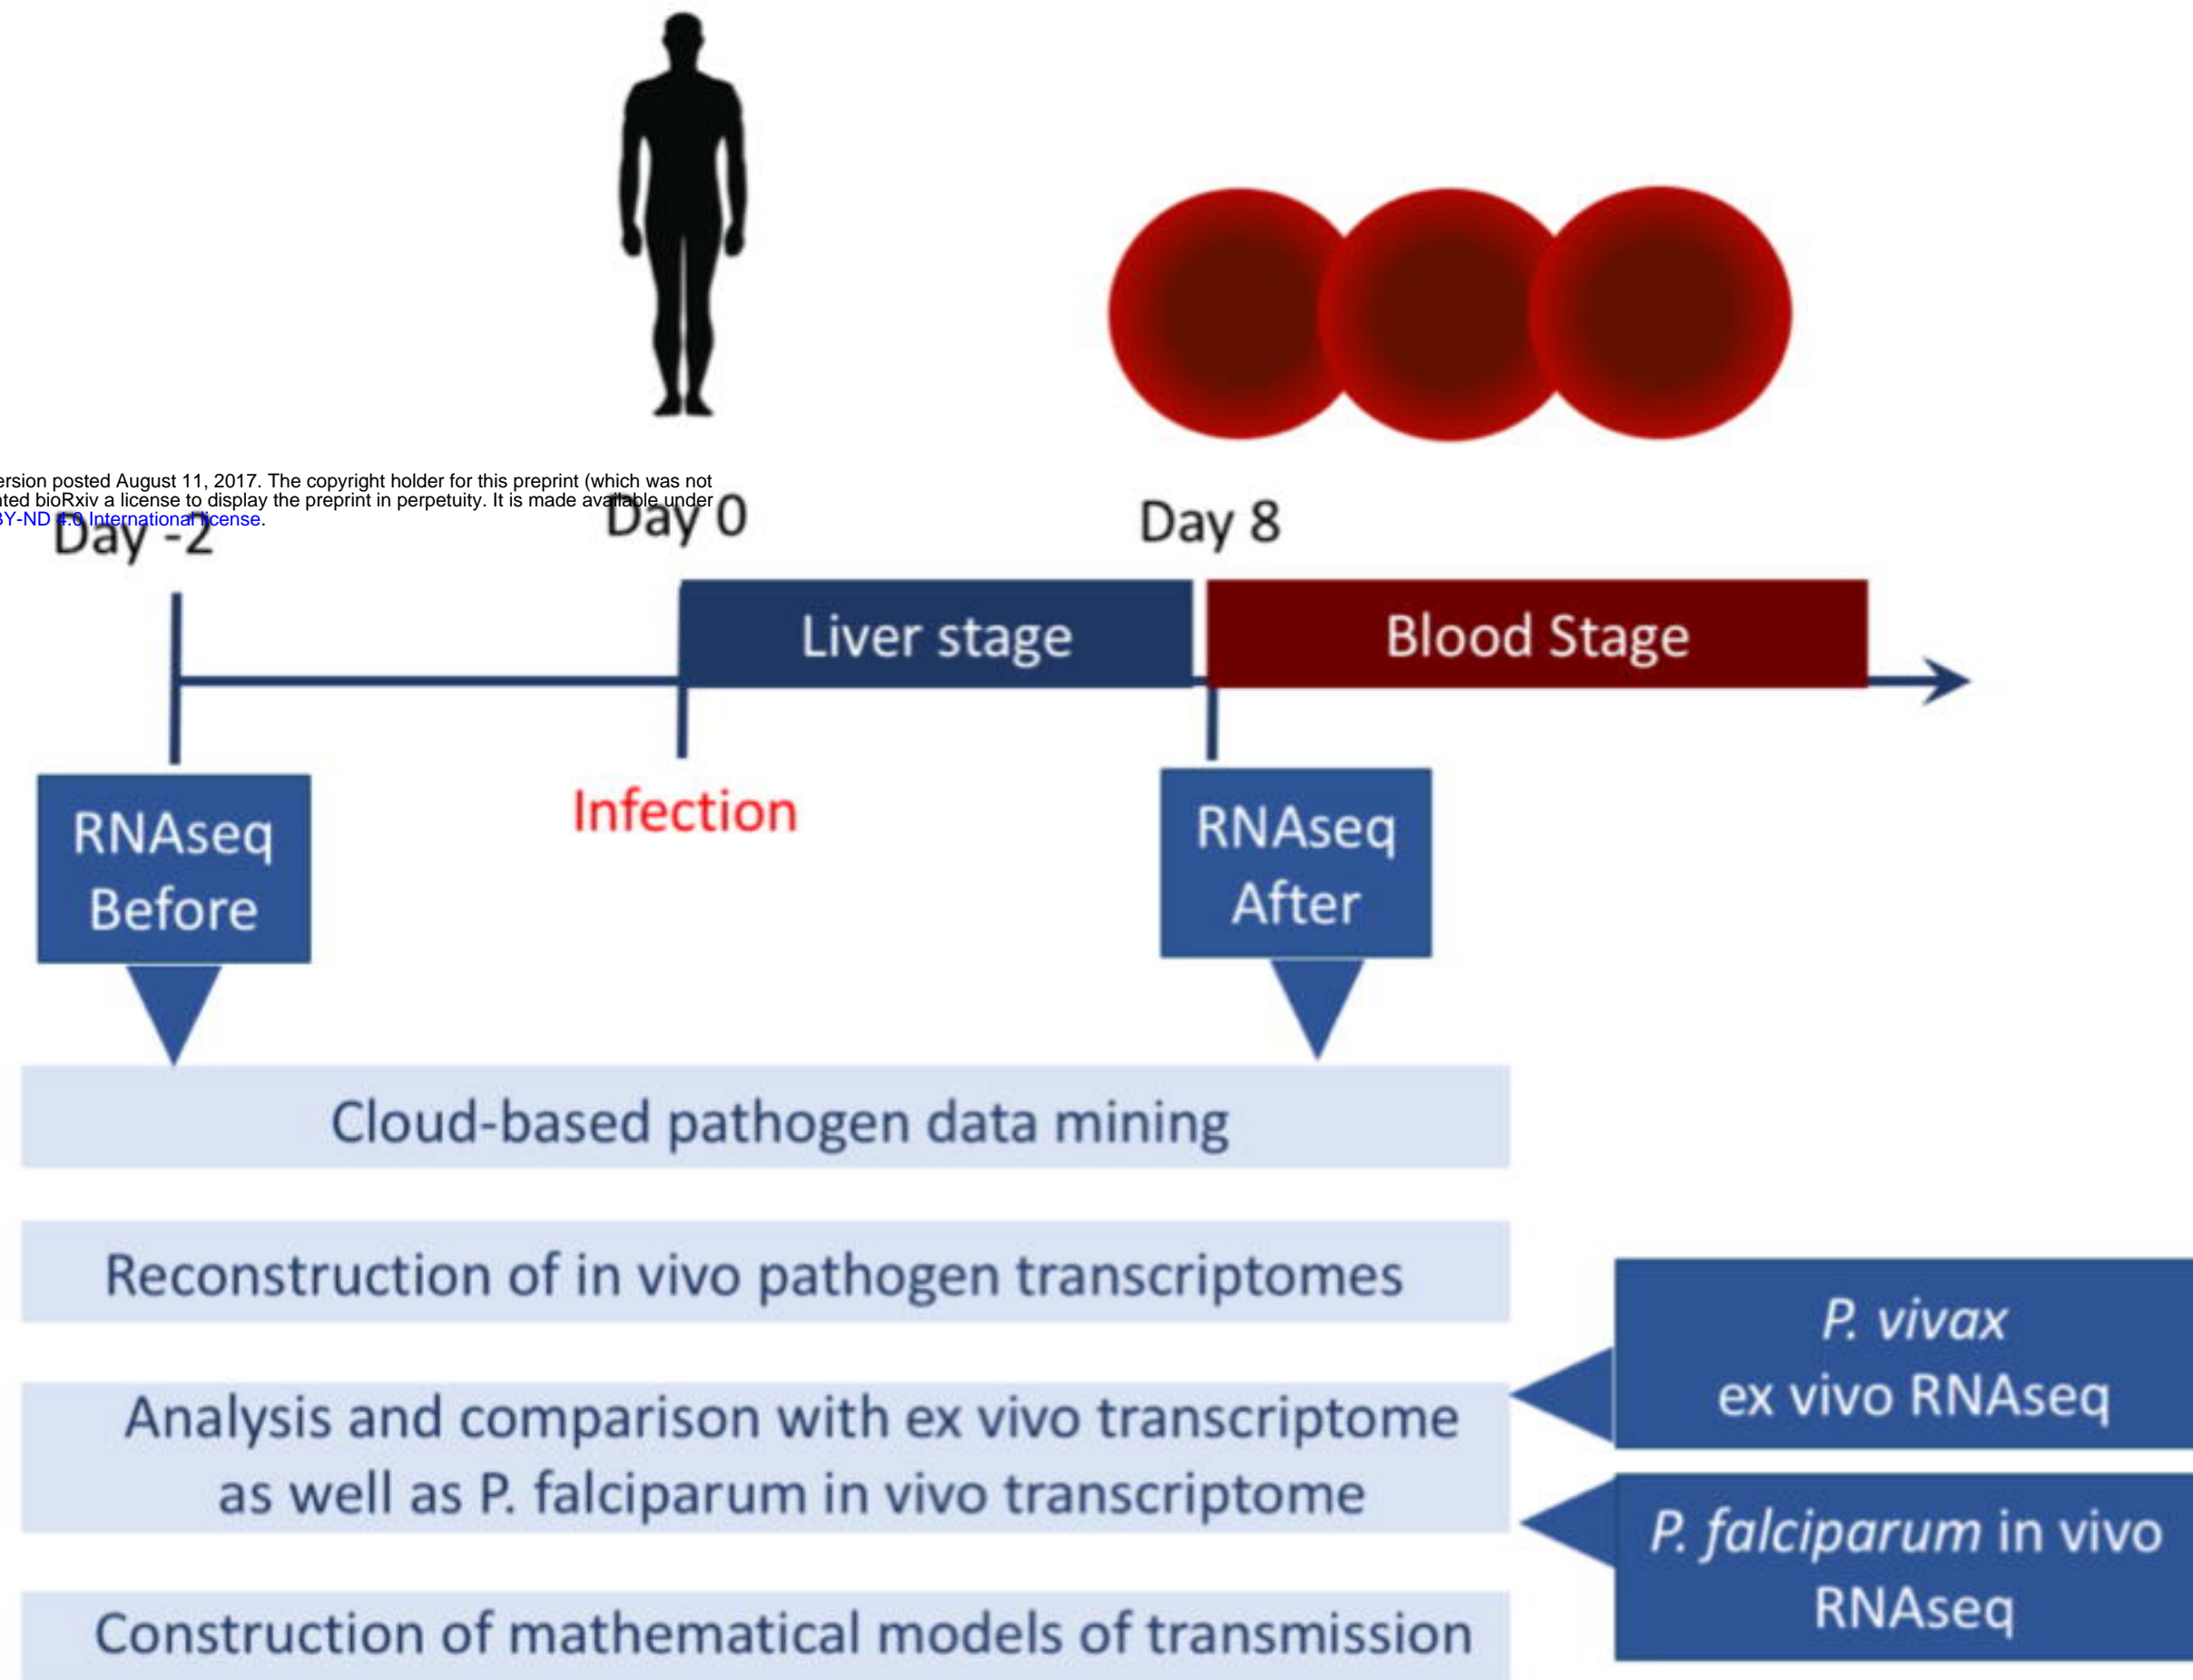

**Fig 1. Study design and protocols.** We have used two sets of RNAseq raw reads data pre and post sporozoite challenge from Rojas-Peña, et al. The post challenge data are inferred as the first blood stage cycle sequencing data. The early transcriptome signature is compared with publicly available *in vivo P. falciparum* and *ex vivo P. vivax* data to cross-validate the gametocyte signature in the early *in vivo P. vivax* infection.



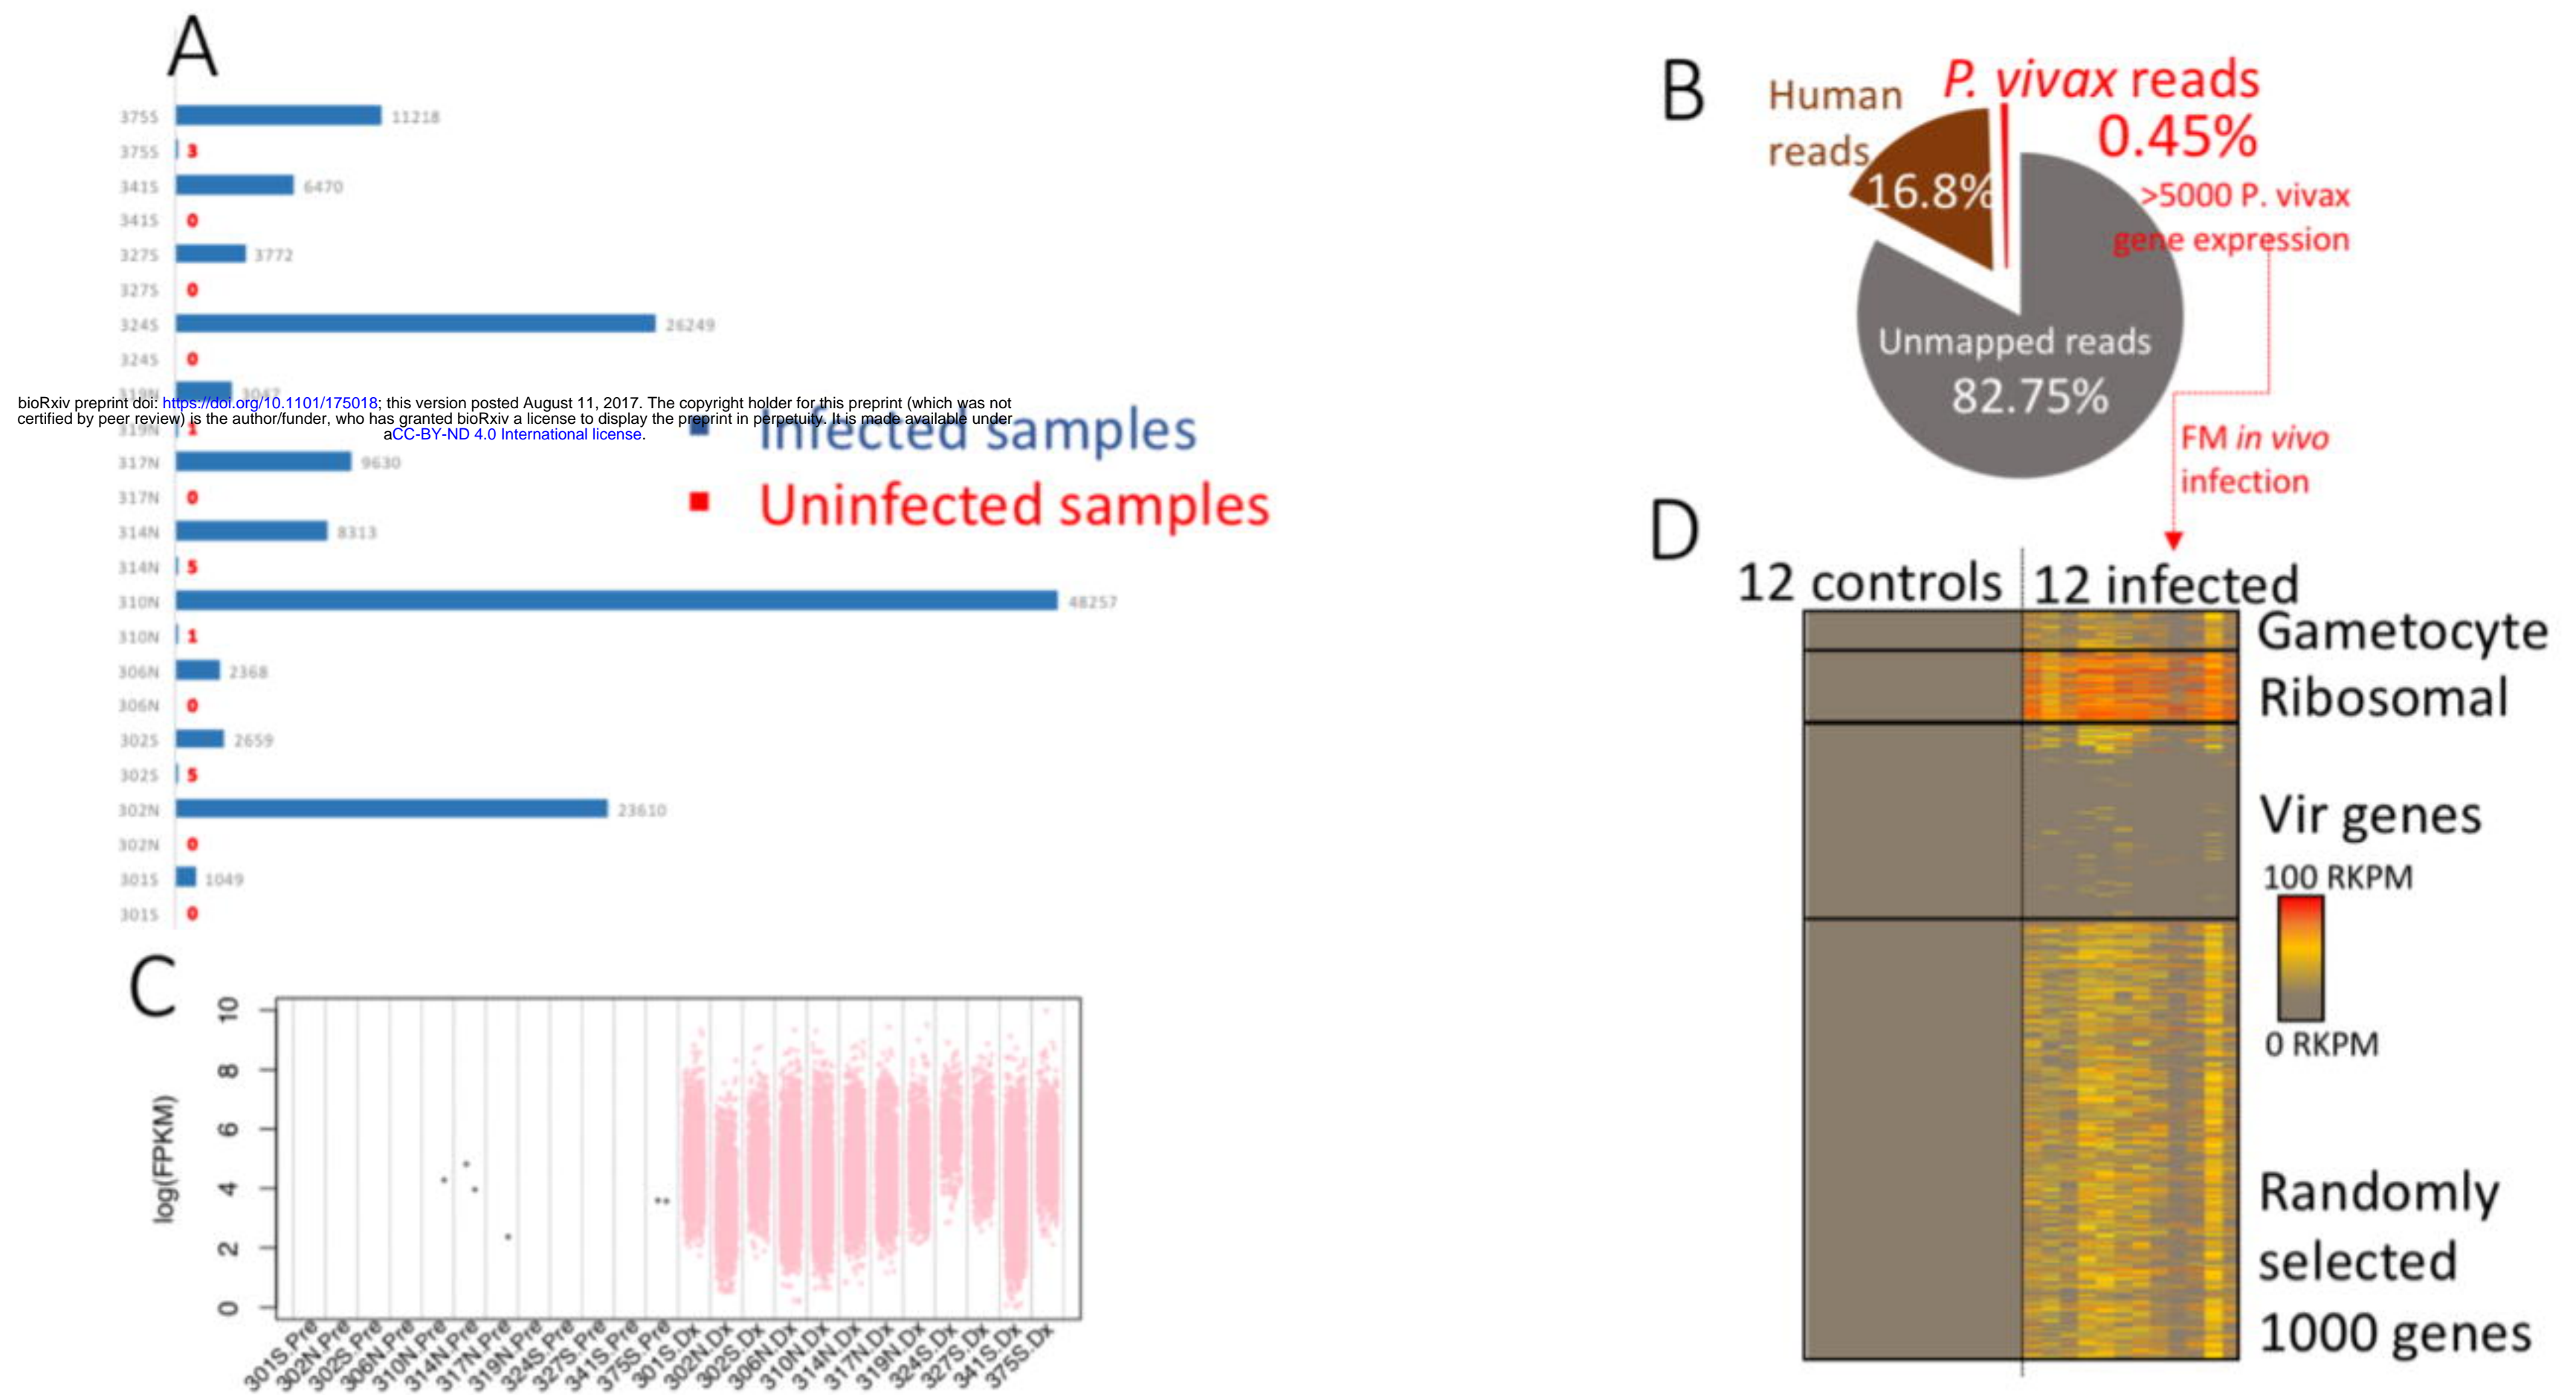

**Fig 2. Recovering the earliest *in vivo* *P. vivax* blood stage transcriptome.** Uninfected and post-infection blood samples were derived from the same individual. A total of 12 paired individual genomics data were analysed. **A.** Cloud-based sequence mining revealed that only the post-infection RNAseq raw data set contains parasite sequences in all patients. Patient identifiers are from the publication by Rojas et al. The *P. vivax* reads number is generated with stringent criteria and reflects conservative estimation. **B.** On average, less than 0.5% of total signal is derived from *P. vivax*. The mapped data of total reads and percentage of alignment in individual patient samples are listed in Table 1. **C.** The log(FPKM) distribution of all patients. FPKM represents fragments per kilobase of exon per million fragments mapped. Pre represents uninfected, while Dx means infected. Only the genes with FPKM > 0 are plotted here. **D.** RNAseq recovered parasite transcriptome in infected samples. Genes expressed in at least two patients are plotted.



A

Pv AP2-G detected  
in five patients during the first cycle of  
blood stage *in vivo*

bioRxiv preprint doi: <https://doi.org/10.1101/175018>; this version posted August 11, 2017. The copyright holder for this preprint (which was not certified by peer review) is the author/funder, who has granted bioRxiv a license to display the preprint in perpetuity. It is made available under aCC-BY-ND 4.0 International license.

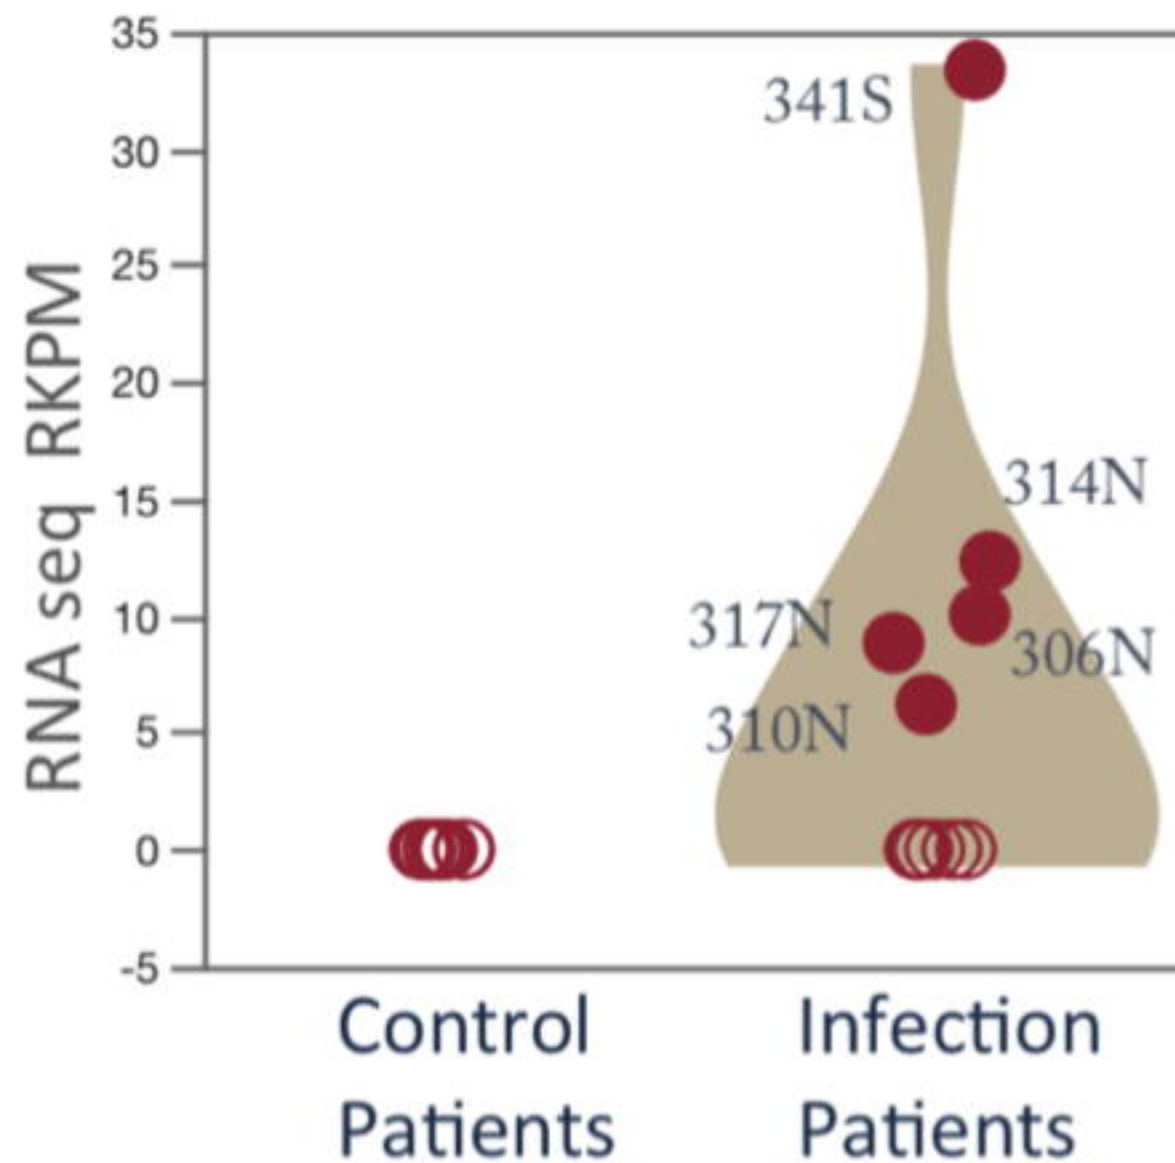

B

Gametocyte genes are most highly expressed  
in ex vivo *P. vivax*

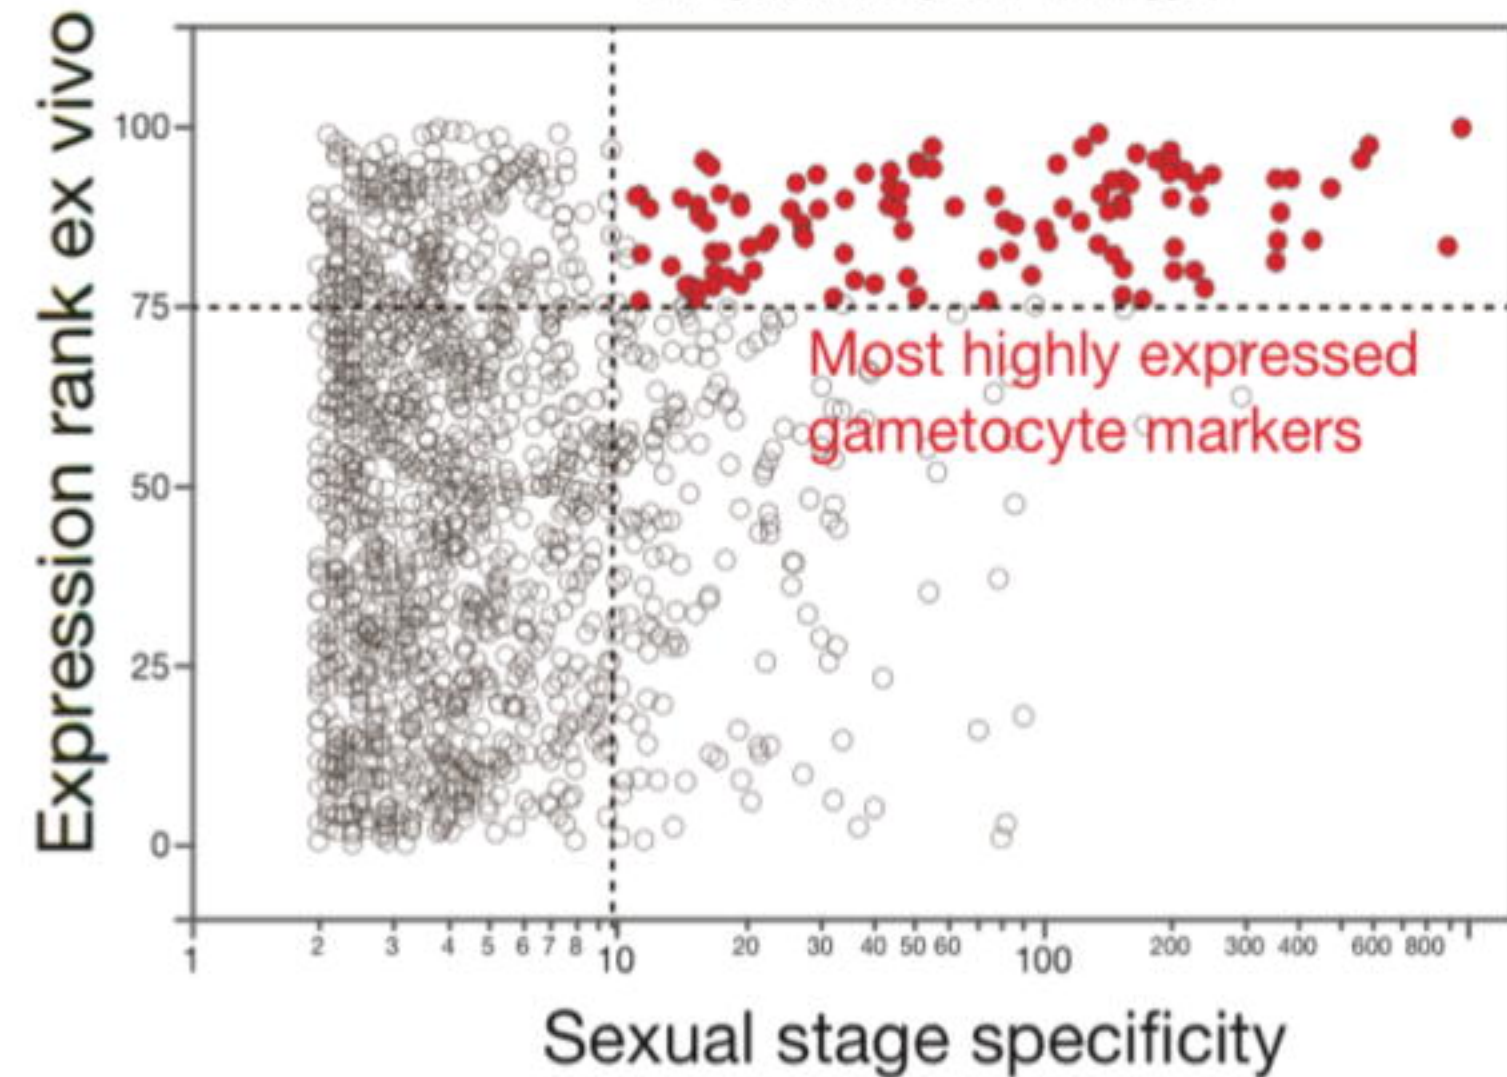

**Fig 3. Discovering gametocyte signatures from early *P. vivax in vivo* RNAseq. A.** Five patients showed expression of PvAP2-G, a master regulator of Plasmodium gametocyte production. **B.** Gametocyte specific genes are the most highly expressed genes in ex vivo *P. vivax* RNAseq transcriptomes. The x axis refers to the ratio of FPKM levels for sexual to asexual stages gene expressions. The top quartile of most highly expressed genes (Normalized rank score  $\geq 75$ ) in the ex vivo data consisted of more than 40% of gametocyte specific genes.



A

*P. falciparum*

in vivo parasitemia is associated  
with protein export

bioRxiv preprint doi: <https://doi.org/10.1101/175018>; this version posted August 11, 2017. The copyright holder for this preprint (which was not certified by peer review) is the author/funder, who has granted bioRxiv a license to display the preprint in perpetuity. It is made available under aCC-BY-ND 4.0 International license.

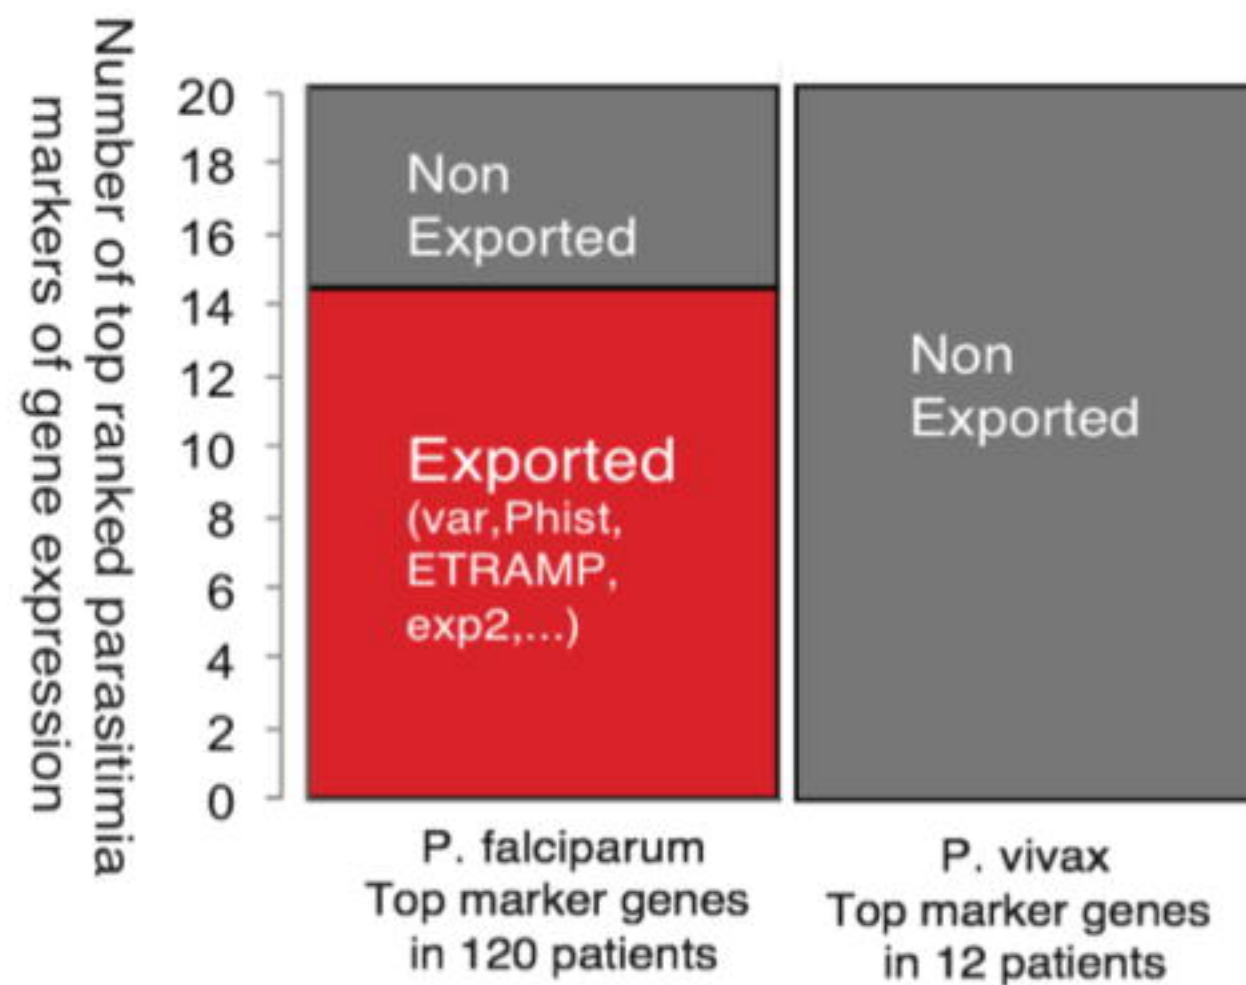

B

*P. vivax*

in vivo parasitemia is associated  
with gametocytogenesis.

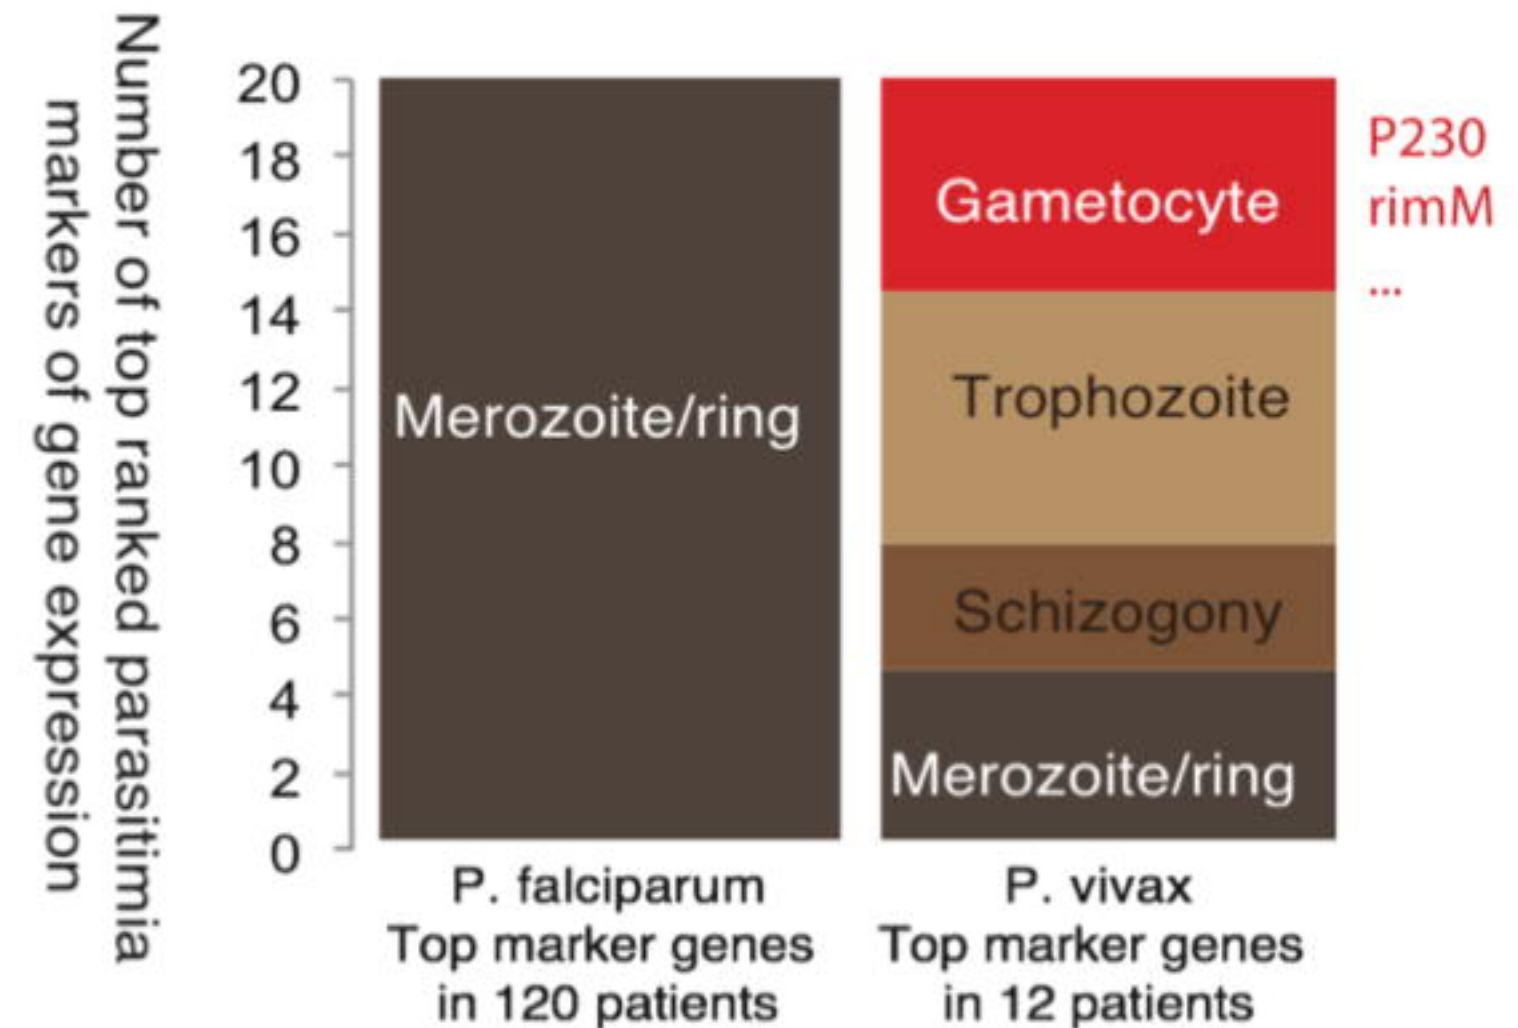

**Fig 4. Comparison of *P. falciparum* and *P. vivax* in vivo transcriptomes.** Top ranked markers that correlated with the levels of parasitemia are used for plotting. The top ranked parasitemia markers in *P. falciparum* are derived from 120 patients' *in vivo* infection data. And the top ranked parasitemia markers in *P. vivax* are from 12 *in vivo* early infection data. **A.** Exported protein proportions in *P. falciparum* and *P. vivax*. Exported proteins are defined as PlasmoDBv27 PEXEL containing proteins; and they are likely be involved in host cell remodelling. **B.** Life cycle peak expression markers in *P. falciparum* and *P. vivax*. The peak expression patterns are assigned with all differentially expressed genes in 7 stages when there are more than 2-fold difference between stages.



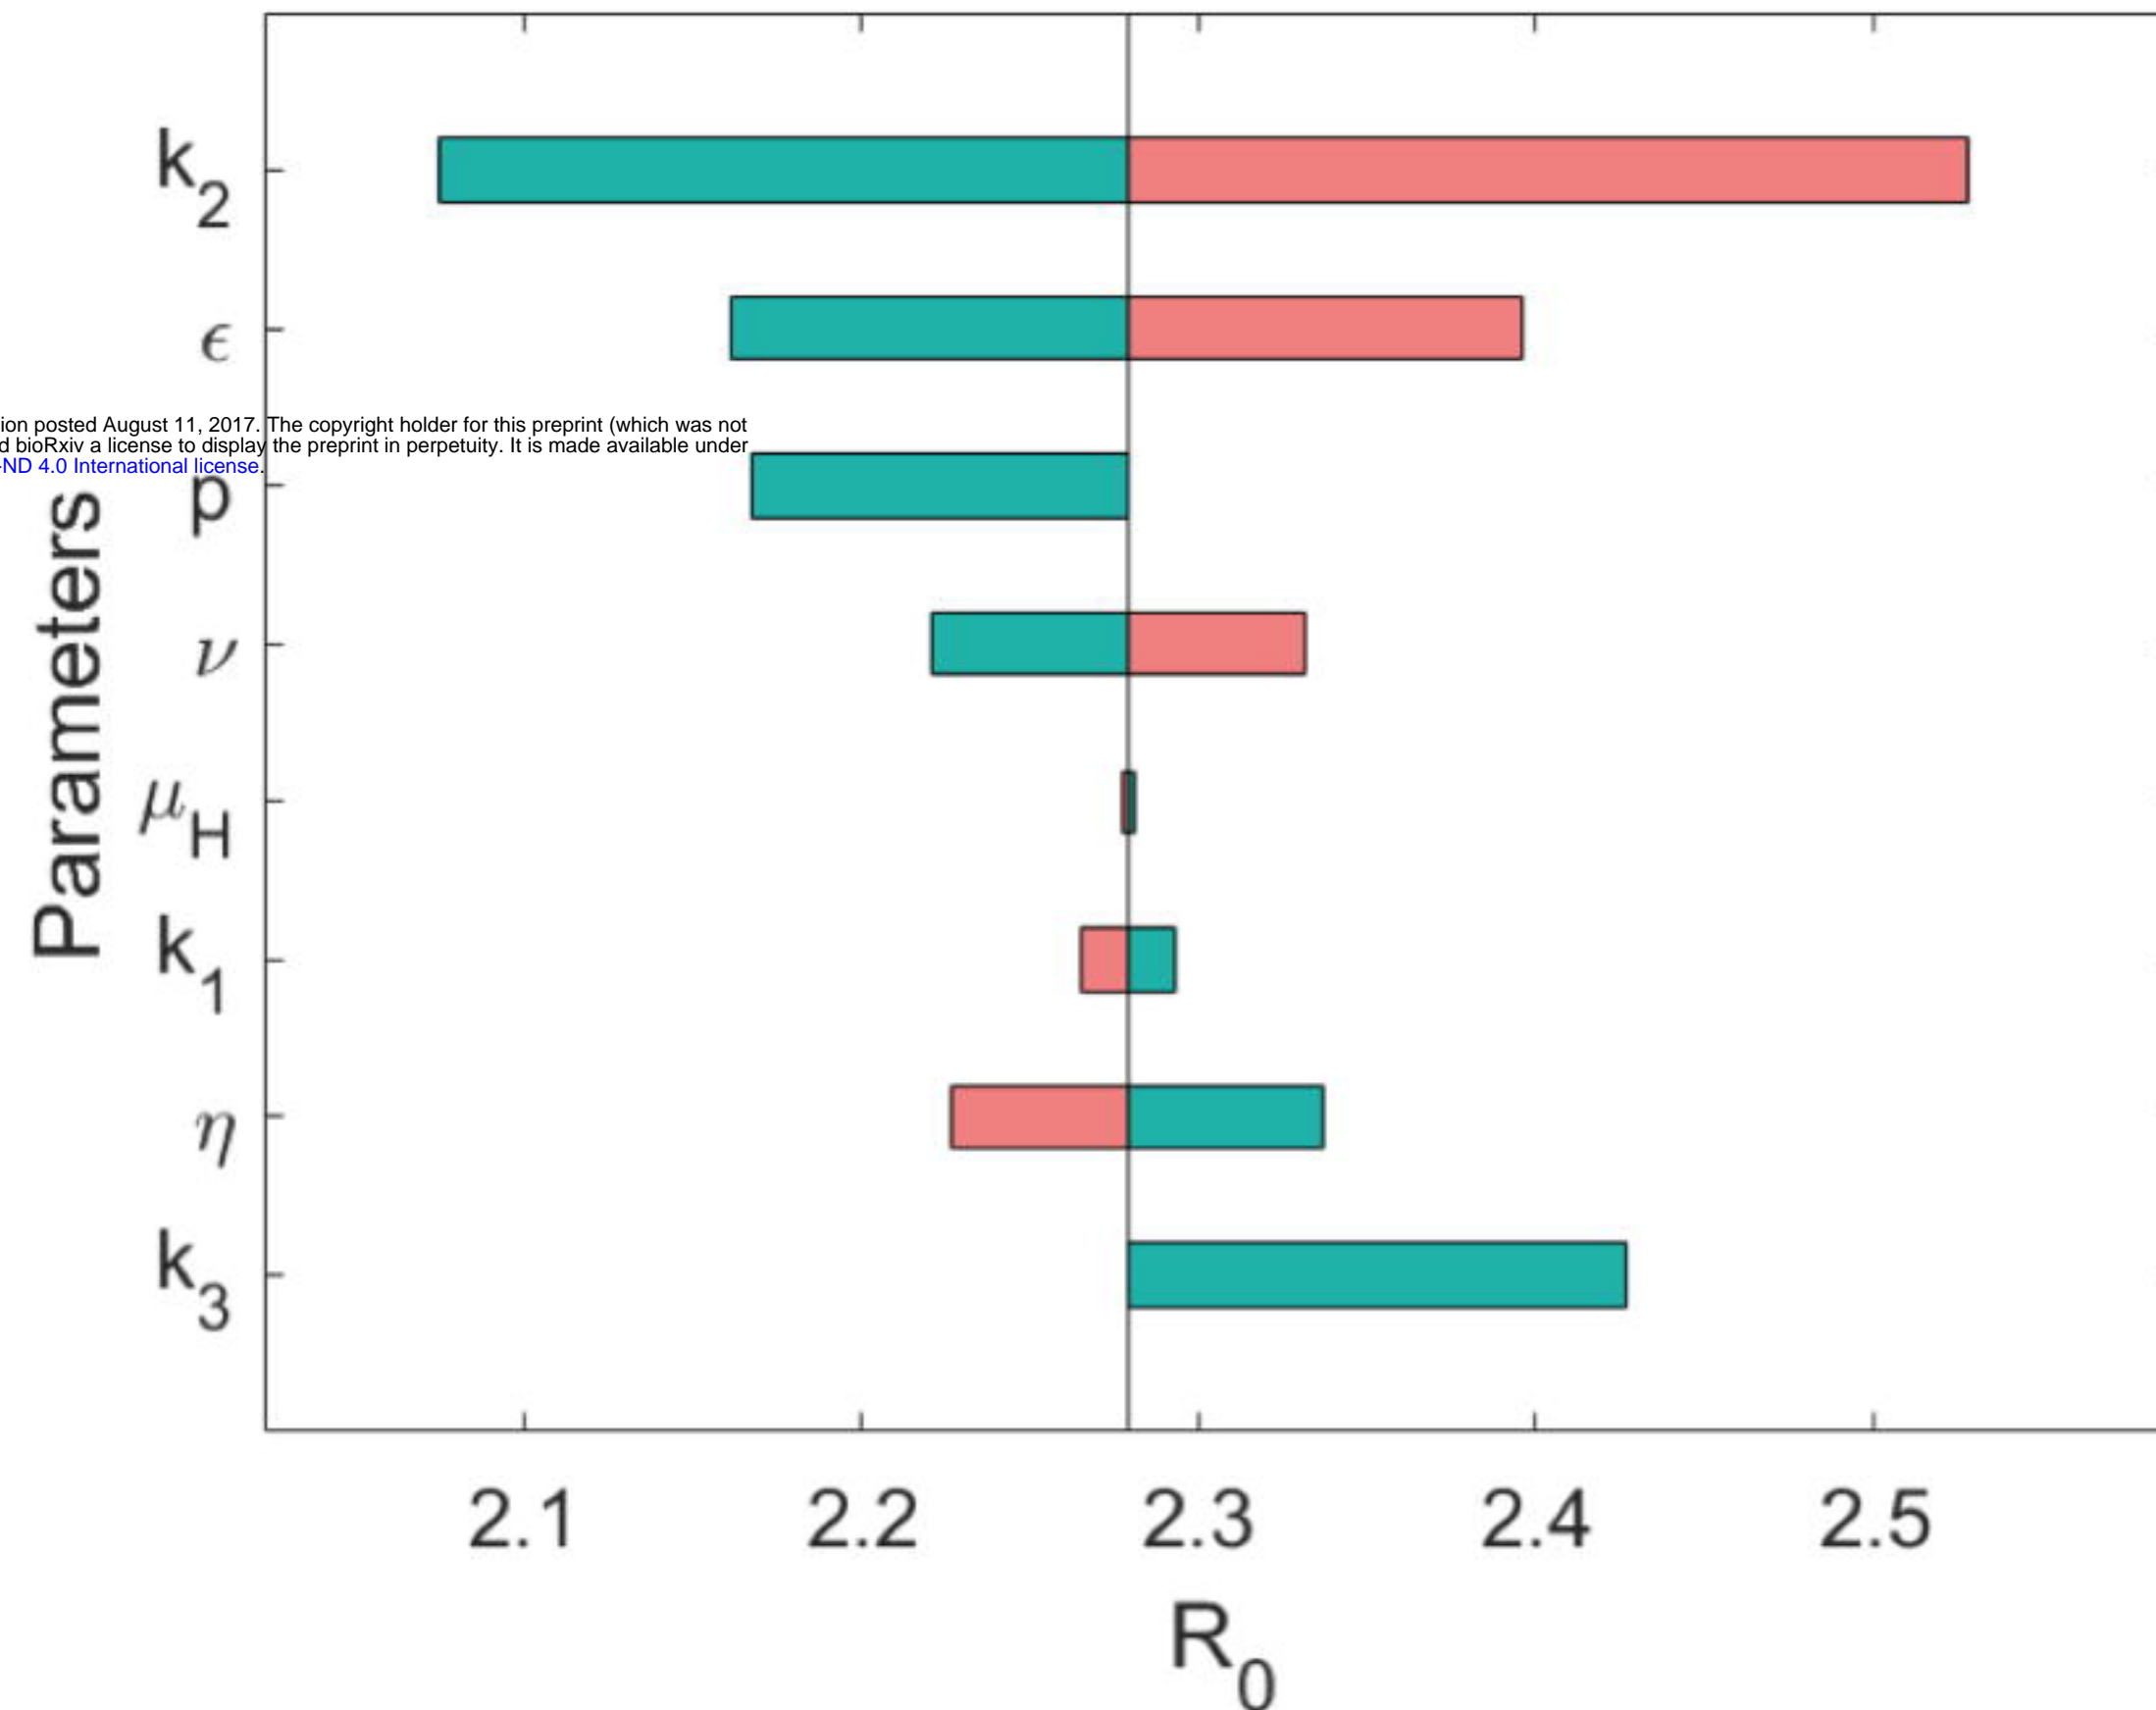

**Fig 5. Mathematical model of *P. vivax* exploring the effect of reduced incubation period on spread of disease.** A sensitivity analysis is performed on  $R_0$  for *P. vivax* (relative to *P. falciparum*). Green indicates when the parameter has been lowered from its baseline value, pink indicates higher than baseline (therefore  $R_0$  is positively correlated with the first four parameters and negatively correlated with the last four parameters). Parameters  $\epsilon$ ,  $p$  and  $k_3$  are varied between 0 – 7, 0 – 1, and 0 – 1 respectively, all other parameters are varied by 10%. Parameters are: proportion of hosts that develop hypnozoites ( $k_2$ ), reduction in incubation time ( $\epsilon$ ), proportion of hosts developing symptoms in *P. falciparum* ( $p$ ), rate of relapsing ( $\nu$ ), host death rate ( $\mu_H$ ), proportional rate of disease-induced death for *P. vivax* ( $k_1$ ), rate of hypnozoite death in liver ( $\eta$ ) and proportion of hosts developing symptoms in *P. vivax* relative to *P. falciparum* ( $k_3$ ). Parameter values are in S1 Text.
